# Supplementary material for: Synthetic, spectral, structural and catalytic activities of 3-D metal format/acetate framework materials for CO2 conversion
Source: Royal Society of Chemistry journal article supplement (doi:10.1039/d3nj01463k), 2023-01-01
Supplement: d3nj01463k1.pdf [file d3nj01463k1.pdf]

# **Synthetic, spectral, structural and catalytic activity of 3-D metal formates/acetates framework materials for CO<sub>2</sub> conversion**

Manoj Trivedi,<sup>a\*</sup> Gurmeet Singh,<sup>a</sup> Raj Kishore Sharma,<sup>a</sup> Nigam P. Rath,<sup>b\*</sup> Ahmed Husain,<sup>c</sup>

<sup>a</sup>Department of Chemistry, University of Delhi, Delhi-110007, INDIA

<sup>b</sup>Department of Chemistry & Biochemistry and Centre for Nanoscience, University of Missouri-St. Louis, One University Boulevard, St. Louis, MO 63121-4499, USA

<sup>c</sup>Department of Chemistry, DAV University Jalandhar, Punjab-144012, India

E-mail address: manojtri@gmail (M.T.); rathn@umsl.edu(NPR).

Corresponding author. Tel.: + 91 9811730475 (MT); (314) 516-5333 (NPR).

# **Supplementary Information**

**Table 1.** Crystallographic data for **1**, and **2**.

|                                        |                                                 |                                                                   |
|----------------------------------------|-------------------------------------------------|-------------------------------------------------------------------|
| Empirical Formula                      | C <sub>2</sub> H <sub>6</sub> O <sub>6</sub> Cu | C <sub>12</sub> H <sub>19</sub> O <sub>12</sub> NaNi <sub>2</sub> |
| FW                                     | 189.61                                          | 495.64                                                            |
| crystal system                         | Monoclinic                                      | Monoclinic                                                        |
| space group                            | <i>P</i> 2 <sub>1</sub> / <i>c</i>              | <i>C</i> 12/ <i>c</i> 1                                           |
| a, Å                                   | 8.4955(15)                                      | 14.641(2)                                                         |
| b, Å                                   | 7.0739(14)                                      | 17.787(3)                                                         |
| c, Å                                   | 9.4178(18)                                      | 8.0993(12)                                                        |
| α, deg                                 | 90                                              | 90                                                                |
| β, deg                                 | 97.021(5)                                       | 114.446(5)                                                        |
| γ, deg                                 | 90                                              | 90                                                                |
| V, Å <sup>3</sup>                      | 561.73(18)                                      | 1920.1(5)                                                         |
| Z                                      | 4                                               | 4                                                                 |
| d <sub>calc</sub> , g cm <sup>-3</sup> | 2.242                                           | 1.715                                                             |
| μ, mm <sup>-1</sup>                    | 3.846                                           | 2.041                                                             |
| T, K                                   | 100(2)                                          | 100(2)                                                            |
| R <sub>1</sub> all                     | 0.0271                                          | 0.0864                                                            |
| R <sub>1</sub> [I > 2σ(I)]             | 0.0218                                          | 0.0686                                                            |
| wR <sub>2</sub>                        | 0.0592                                          | 0.1952                                                            |
| wR <sub>2</sub> [I > 2σ(I)]            | 0.0565                                          | 0.1740                                                            |
| GOF on F <sup>2</sup>                  | 1.070                                           | 1.349                                                             |

**Table 2.** Selected bond lengths (Å), and bond angles (°) for **1**, and **2**.

| <b>Complex-1</b>               |            | <b>Complex-2</b>  |            |
|--------------------------------|------------|-------------------|------------|
| Cu(1)-O(5) <sup>#1</sup>       | 1.9659(10) | Ni(1)-Ni(1)       | 2.5885(11) |
| Cu(1)-O(5)                     | 1.9659(10) | Ni(1)-Na(1)       | 3.3712(14) |
| Cu(1)-O(1)                     | 2.0079(9)  | Ni(1)-O(1)        | 1.953(3)   |
| Cu(1)-O(1) <sup>#1</sup>       | 2.0079(9)  | Ni(1)-O(2)        | 1.977(4)   |
| Cu(1)-O(6) <sup>#2</sup>       | 2.3314(10) | Ni(1)-O(3)        | 2.159(3)   |
| Cu(1)-O(6) <sup>#3</sup>       | 2.3314(10) | Ni(1)-O(5)        | 1.956(3)   |
| Cu(2)-O(4) <sup>#4</sup>       | 1.9499(10) | Ni(1)-O(6)        | 1.958(3)   |
| Cu(2)-O(4)                     | 1.9499(10) | Na(1)-O(2)        | 2.364(4)   |
| Cu(2)-O(3) <sup>#4</sup>       | 2.0074(11) | Na(1)-O(3)        | 2.406(3)   |
| Cu(2)-O(3)                     | 2.0074(11) | Na(1)-O(4)        | 2.402(4)   |
| Cu(2)-O(2)                     | 2.3900(11) | O(1)-C(1)         | 1.262(6)   |
| Cu(2)-O(2) <sup>#4</sup>       | 2.3900(11) | O(2)-C(1)         | 1.264(6)   |
| O(1)-C(1)                      | 1.2732(15) | O(3)-C(3)         | 1.247(6)   |
| O(2)-C(1)                      | 1.2482(16) | O(4)-C(3)         | 1.306(6)   |
| O(5)-C(2)                      | 1.2773(15) | O(5)-C(5)         | 1.270(6)   |
| O(6)-C(2)                      | 1.2424(16) | O(6)-C(5)         | 1.260(6)   |
| O(6)-Cu(1) <sup>#5</sup>       | 2.3314(10) | Ni(1)-Ni(1)-Na(1) | 124.31(4)  |
| O(5) <sup>#1</sup> -Cu(1)-O(5) | 180.0      | O(1)-Ni(1)-Ni(1)  | 86.49(10)  |
| O(5) <sup>#1</sup> -Cu(1)-O(1) | 87.54(4)   | O(1)-Ni(1)-Na(1)  | 145.97(10) |

---

|                     |            |                   |            |
|---------------------|------------|-------------------|------------|
| O(5)-Cu(1)-O(1)     | 92.46(4)   | O(1)-Ni(1)-O(2)   | 169.48(14) |
| O(5)#1-Cu(1)-O(1)#1 | 92.46(4)   | O(1)-Ni(1)-O(3)   | 103.89(13) |
| O(5)-Cu(1)-O(1)#1   | 87.54(4)   | O(1)-Ni(1)-O(5)   | 90.35(15)  |
| O(1)-Cu(1)-O(1)#1   | 180.0      | O(1)-Ni(1)-O(6)   | 88.65(16)  |
| O(5)#1-Cu(1)-O(6)#2 | 89.41(4)   | O(2)-Ni(1)-Ni(1)  | 83.07(10)  |
| O(5)-Cu(1)-O(6)#2   | 90.59(4)   | O(2)-Ni(1)-Na(1)  | 43.41(10)  |
| O(1)-Cu(1)-O(6)#2   | 92.42(4)   | O(2)-Ni(1)-O(3)   | 86.52(13)  |
| O(1)#1-Cu(1)-O(6)#2 | 87.58(4)   | O(3)-Ni(1)-Ni(1)  | 169.52(9)  |
| O(5)#1-Cu(1)-O(6)#3 | 90.59(4)   | O(3)-Ni(1)-Na(1)  | 45.31(9)   |
| O(5)-Cu(1)-O(6)#3   | 89.41(4)   | O(5)-Ni(1)-Ni(1)  | 85.23(11)  |
| O(1)-Cu(1)-O(6)#3   | 87.58(4)   | O(5)-Ni(1)-Na(1)  | 105.01(11) |
| O(1)#1-Cu(1)-O(6)#3 | 92.42(4)   | O(5)-Ni(1)-O(2)   | 90.03(16)  |
| O(4)-Cu(2)-O(3)     | 90.79(4)   | O(5)-Ni(1)-O(3)   | 96.04(13)  |
| O(4)-Cu(2)-O(2)     | 90.40(4)   | O(5)-Ni(1)-O(6)   | 169.59(14) |
| O(3)-Cu(2)-O(2)     | 86.64(4)   | O(6)-Ni(1)-Ni(1)  | 84.37(11)  |
| C(1)-O(1)-Cu(1)     | 126.05(9)  | O(6)-Ni(1)-Na(1)  | 81.29(11)  |
| C(1)-O(2)-Cu(2)     | 129.33(9)  | O(6)-Ni(1)-O(2)   | 89.07(16)  |
| O(2)-C(1)-O(1)      | 123.92(13) | O(6)-Ni(1)-O(3)   | 94.25(14)  |
| O(6)-C(2)-O(5)      | 123.51(11) | Ni(1)-Na(1)-Ni(1) | 124.29(8)  |
|                     |            | O(2)-Na(1)-Ni(1)  | 35.06(9)   |
|                     |            | O(2)-Na(1)-Ni(1)  | 106.14(12) |

---

|                  |            |
|------------------|------------|
| O(2)-Na(1)-O(3)  | 110.00(13) |
| O(2)-Na(1)-O(4)  | 150.75(12) |
| O(3)-Na(1)-Ni(1) | 144.10(11) |
| O(4)-Na(1)-Ni(1) | 118.65(9)  |
| C(1)-O(1)-Ni(1)  | 121.8(3)   |
| Ni(1)-O(2)-Na(1) | 101.53(15) |

---

**Table 3.** Hydrogen bond parameters for **1**, and **2**.

| D-H...A-X                                                                                                                                               | <i>d</i> H...A Å | <i>D</i> D...A Å | $\theta$ D-H...A° |
|---------------------------------------------------------------------------------------------------------------------------------------------------------|------------------|------------------|-------------------|
| <b>Complex-1</b>                                                                                                                                        |                  |                  |                   |
| C(1)-H(1)...O(5)                                                                                                                                        | 2.427(17)        | 3.0163(17)       | 119.4(13)         |
| C(2)-H(2)...O(6) <sup>#2</sup>                                                                                                                          | 2.390(18)        | 2.9408(18)       | 115.9(12)         |
| O(4)-H(4A)...O(2) <sup>#6</sup>                                                                                                                         | 1.80(2)          | 2.6652(14)       | 174(2)            |
| O(4)-H(4B)...O(6) <sup>#7</sup>                                                                                                                         | 1.86(2)          | 2.7105(14)       | 169(2)            |
| O(3)-H(3A)...O(1)                                                                                                                                       | 1.92(2)          | 2.7301(15)       | 168(2)            |
| O(3)-H(3A)...O(2)                                                                                                                                       | 2.60(2)          | 3.0299(15)       | 113.6(17)         |
| O(3)-H(3B)...O(5) <sup>#7</sup>                                                                                                                         | 1.94(2)          | 2.7549(14)       | 175(2)            |
| Symmetry transformations used to generate equivalent atoms: <sup>#2</sup> -x+2,y+1/2,-z+3/2;<br><sup>#6</sup> -x+1,y+1/2,-z+3/2; <sup>#7</sup> x,y+1,z. |                  |                  |                   |
| <b>Complex-2</b>                                                                                                                                        |                  |                  |                   |
| O(4)-H(4)...O(4) <sup>#4</sup>                                                                                                                          | 1.18(2)          | 2.3529(14)       | 180(2)            |
| C(2)-H(2C)...O(6) <sup>#5</sup>                                                                                                                         | 2.41(2)          | 3.3007(15)       | 150(2)            |
| C(4)-H(4B)...O(5) <sup>#6</sup>                                                                                                                         | 2.57(2)          | 3.5105(15)       | 162(2)            |
| Symmetry transformations used to generate equivalent atoms: <sup>#4</sup> 1-x,-y,-2-z;<br><sup>#5</sup> 1/2+x,1/2-y,-1/2+z; <sup>#6</sup> x,-y,-1/2+z.  |                  |                  |                   |

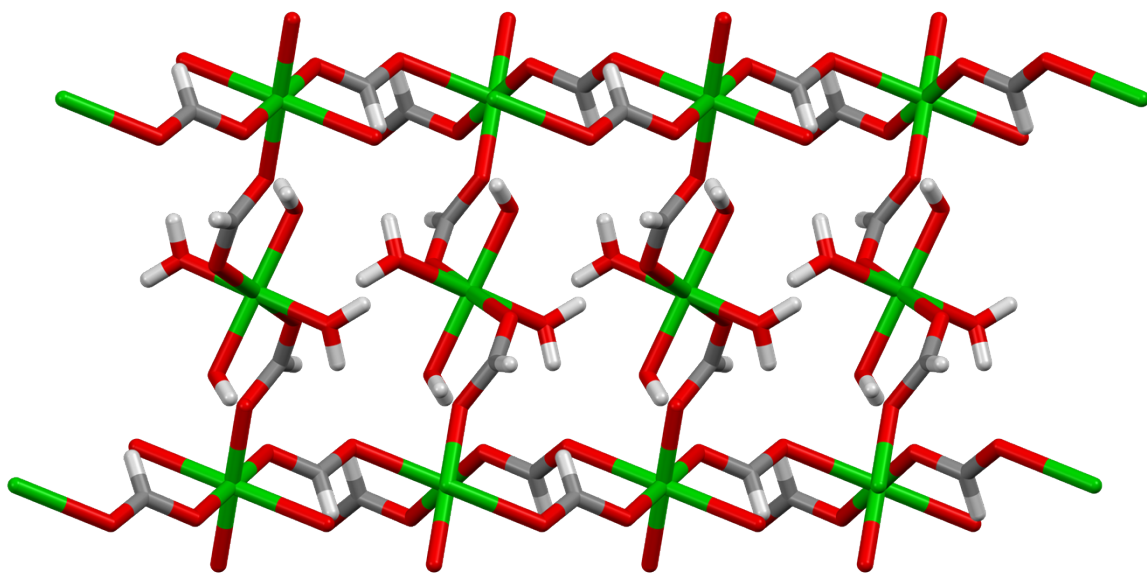

**Figure S1.** Packing diagram down *b*- axis in compound **1**.



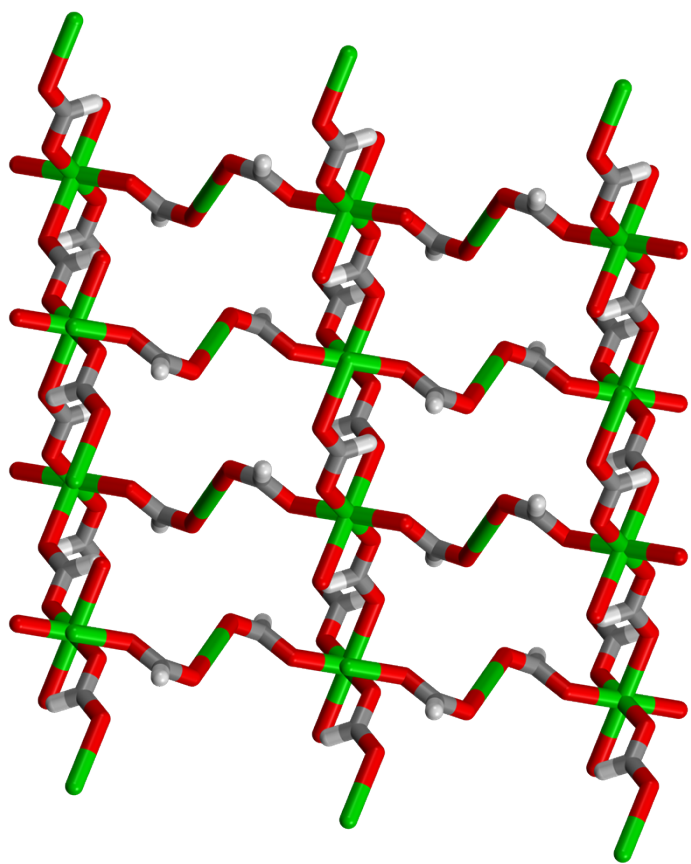

**Figure S2.** Packing diagram down *b*-axis without water in compound **1**.

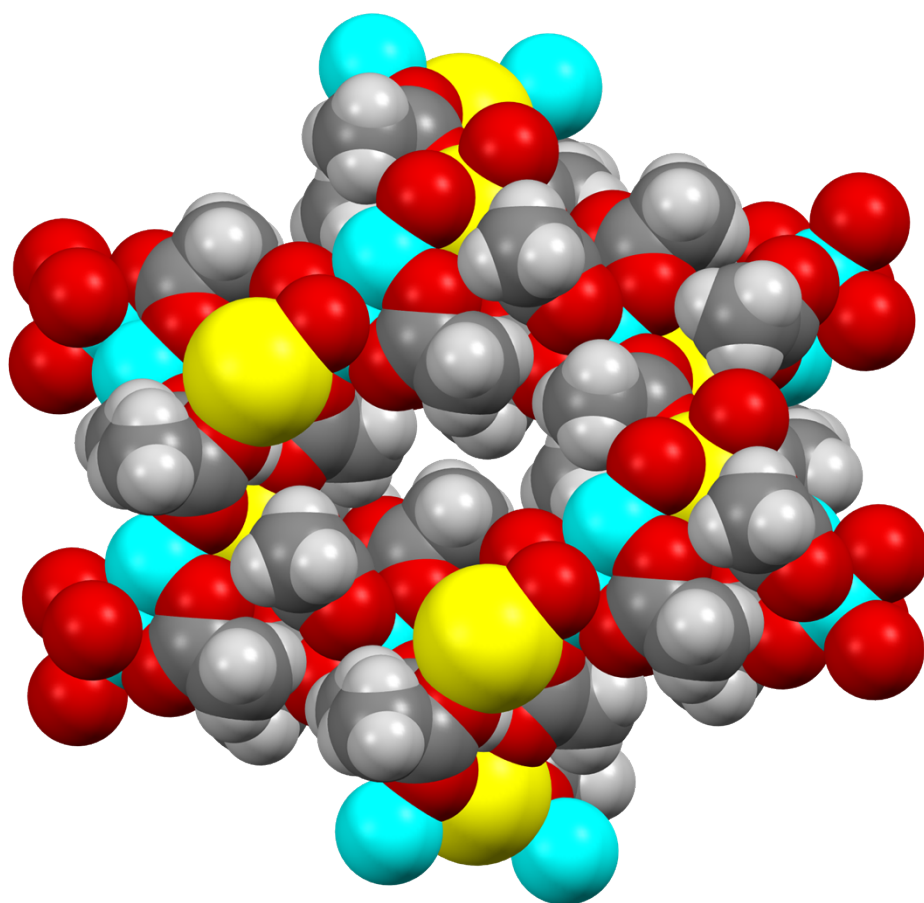

**Figure S3.** Channels formed down the  $c$ -axis in **2**.

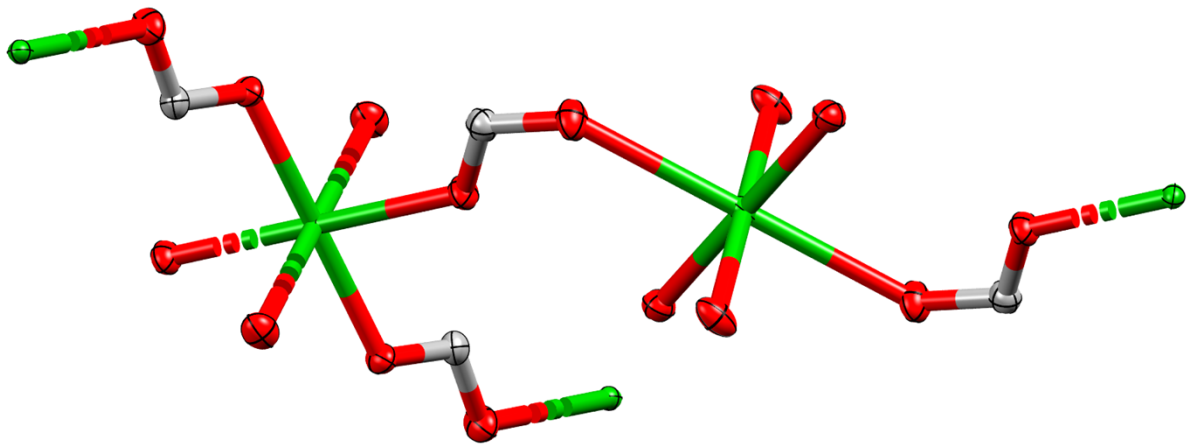

[1]

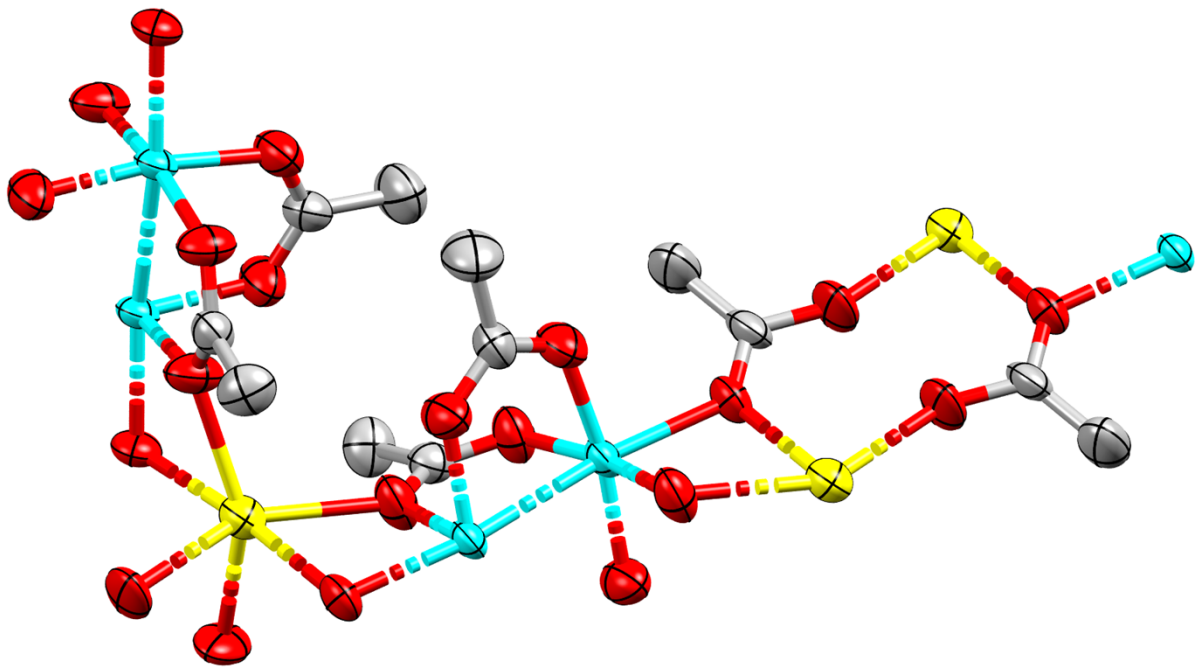

[2]

**Figure S4.** Elipsoidal (adp) molecular view of  $[\text{Cu}_2(\text{HCO}_2)_2(\text{H}_2\text{O})_2]_n$  (**1**), and  $[\text{Na}\{\text{Ni}(\text{CH}_3\text{CO}_2)_2(\text{CH}_3\text{CO}_2\text{H})\}]_n$  (**2**). Colour code: Cu (green), Ni (cyan), Na (yellow), C (grey) and O (red). H-atoms are omitted for the clarity of the picture.

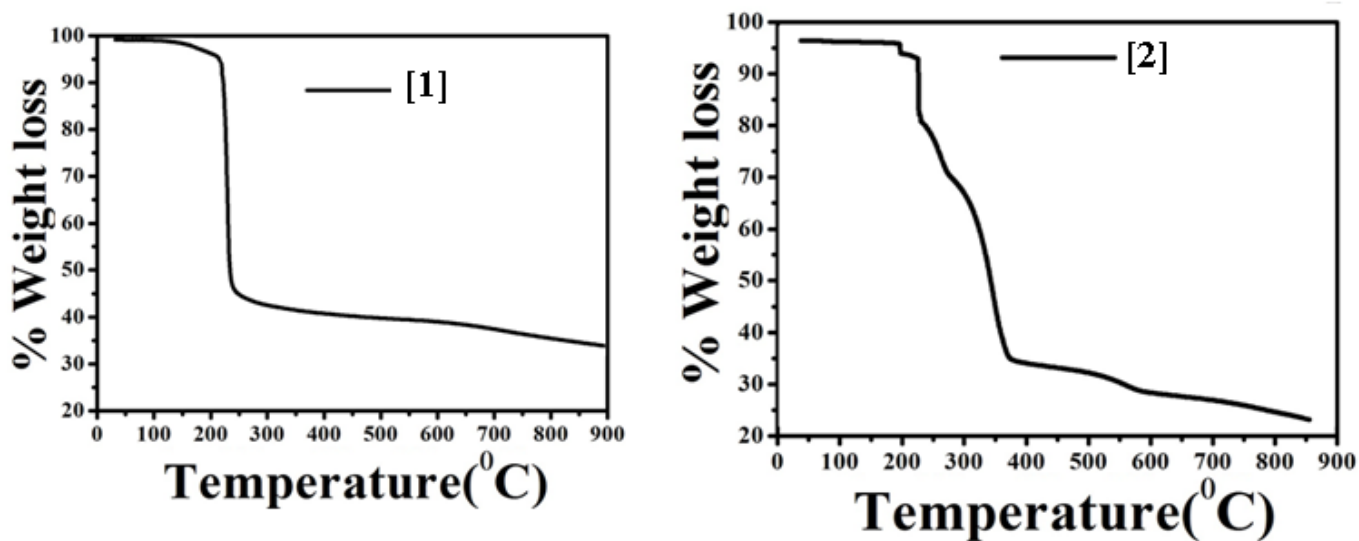

**Figure S5.** TGA profiles of  $[\text{Cu}_2(\text{HCO}_2)_2(\text{H}_2\text{O})_2]_n$  (**1**), and  $[\text{Na}\{\text{Ni}(\text{CH}_3\text{CO}_2)_2(\text{CH}_3\text{CO}_2\text{H})\}]_n$  (**2**) recorded under nitrogen flow.

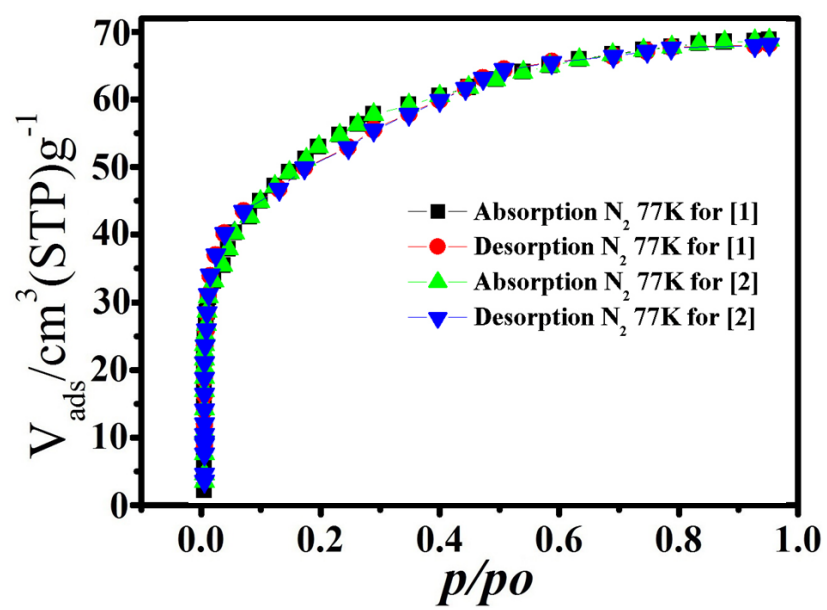

Figure S6.  $\text{N}_2$  adsorption and desorption isotherm at 77K of **1** and **2**.

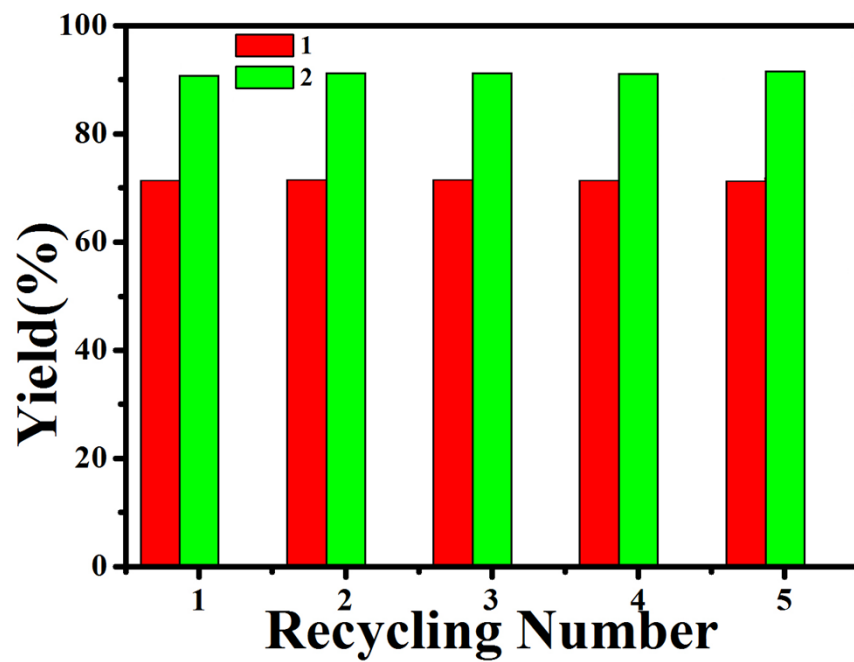

**Figure S7.** Histogram of recyclability study (five cycles) for catalytic activities of **1** and **2** in coupling of glycidol with CO<sub>2</sub>.

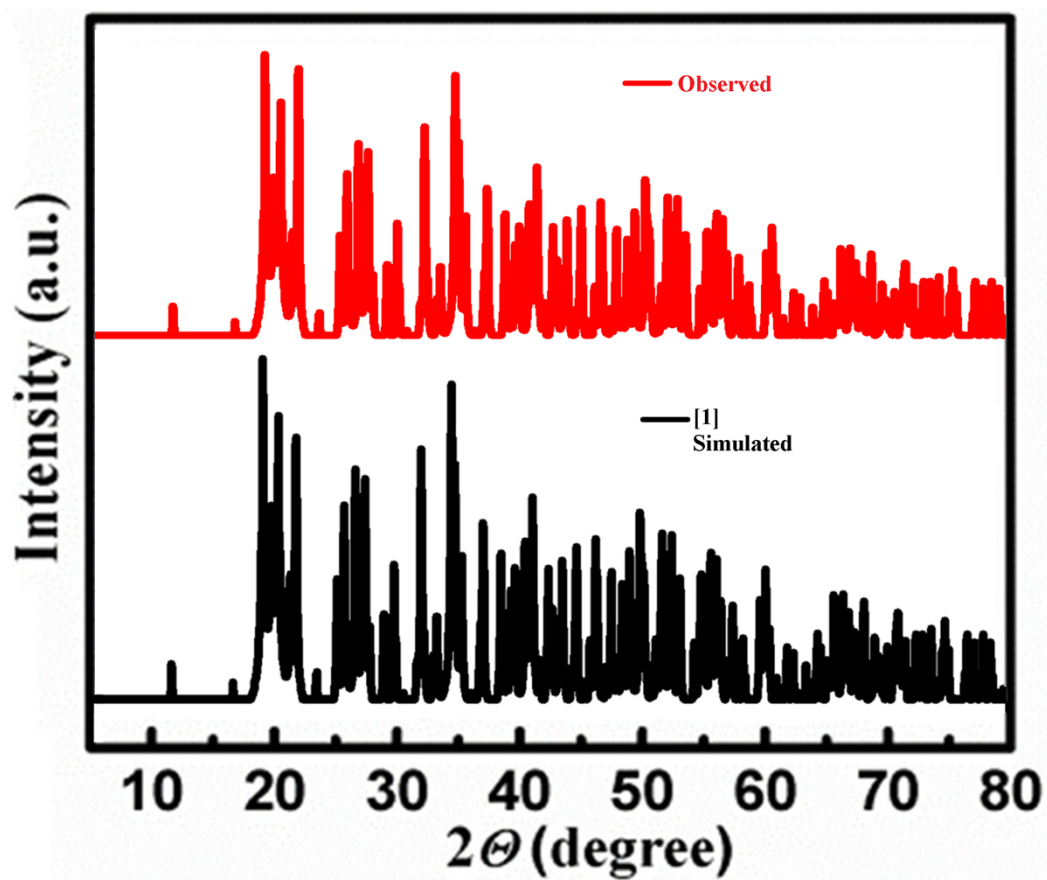

**Figure S8.** Powder XRD pattern of **1** after the catalytic reaction for coupling of glycidol with  $\text{CO}_2$ . (Simulated = theoretical profile based on the structures determined by single-crystal XRD; Observed= experimental data).

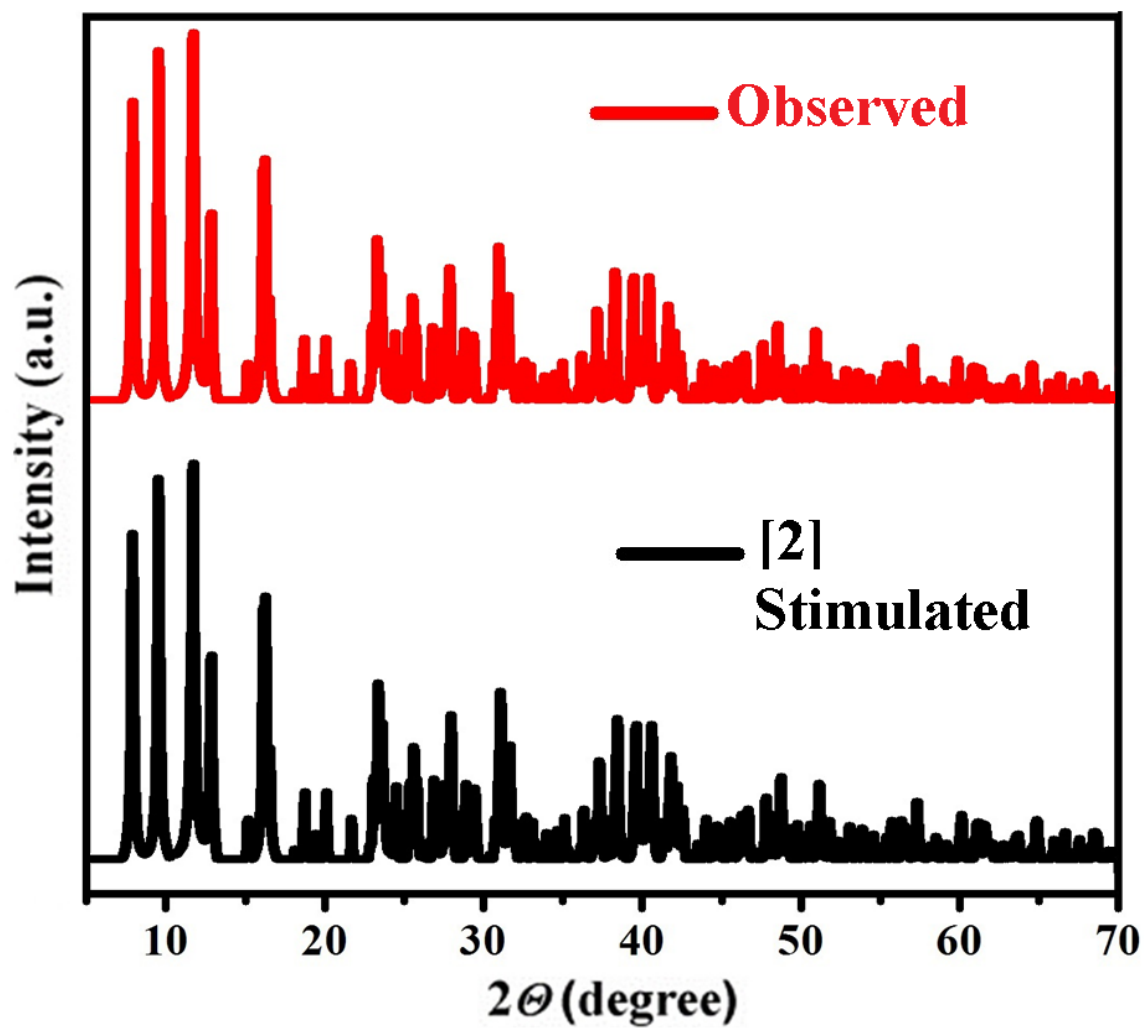



**Figure S9.** Powder XRD pattern of **2** after the catalytic reaction for coupling of glycidol with CO<sub>2</sub>. (Simulated = theoretical profile based on the structures determined by single-crystal XRD; Observed= experimental data).

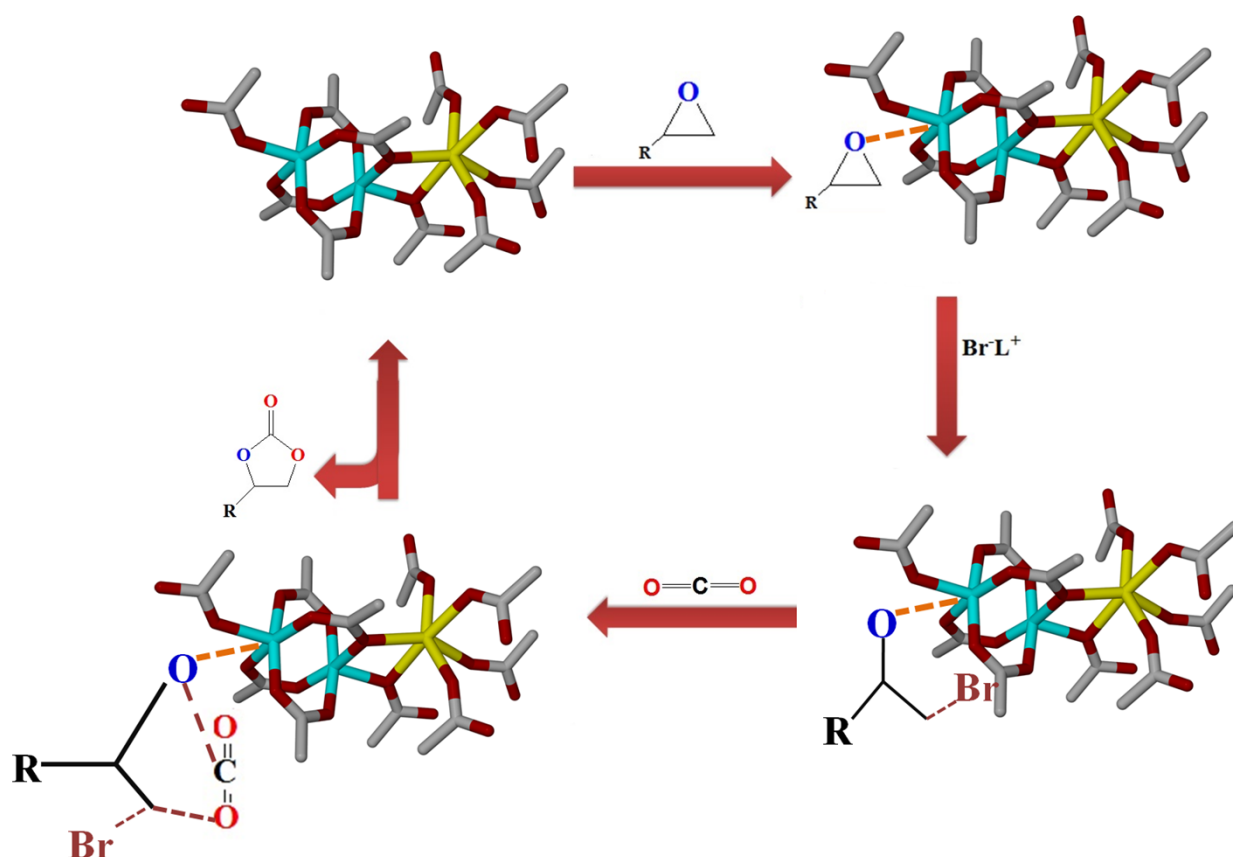

**Figure S10.** The proposed mechanism for the cycloaddition reaction of epoxide and CO<sub>2</sub> to form cyclic carbonates catalyzed by **2**.

| Entry | MOFs                                                                                                                               | Co-catalyst           | Reaction conditions<br>T[K]/P[atm]/Time[h] | %<br>yield | Ref.         |
|-------|------------------------------------------------------------------------------------------------------------------------------------|-----------------------|--------------------------------------------|------------|--------------|
| 1.    | [Cu <sub>3</sub> (BTC) <sub>2</sub> ] or HKUST-1                                                                                   | n-Bu <sub>4</sub> NBr | 273/1 atm./48h                             | 49         | 1            |
| 2.    | [Cu <sub>2</sub> (BPTC)(H <sub>2</sub> O) <sub>2</sub> ] or MOF-505                                                                | n-Bu <sub>4</sub> NBr | 273/1 atm./48h                             | 48         | 1            |
| 3.    | [CuL1] or BIT-C                                                                                                                    | n-Bu <sub>4</sub> NBr | 333/1 atm./6h                              | 95-99      | 2            |
| 4.    | [Cu(HIP) <sub>2</sub> (BPY)]                                                                                                       | -                     | 393/12 atm./6h                             | 10-73      | 3            |
| 5.    | Cu <sub>2</sub> (Cu-TACTMB)(H <sub>2</sub> O) <sub>3</sub> (NO <sub>3</sub> ) <sub>2</sub> or MMCF-2                               | n-Bu <sub>4</sub> NBr | 273/1 atm/48h                              | 42-95      | 1            |
| 6.    | Cu <sub>6</sub> (Cu-TDPBPP)(HCO <sub>2</sub> ) <sub>4</sub> (H <sub>2</sub> O) <sub>6</sub> or MMPF-9                              | n-Bu <sub>4</sub> NBr | 273/1 atm/48h                              | 30-87      | 4            |
| 7.    | Cu <sub>4</sub> MTPP                                                                                                               | n-Bu <sub>4</sub> NBr | 273/1 atm/48h                              | 83-96      | 5            |
| 8.    | [Cu <sub>7</sub> (H <sub>1</sub> L) <sub>2</sub> (TPT) <sub>3</sub> (H <sub>2</sub> O) <sub>6</sub> ]                              | n-Bu <sub>4</sub> NBr | 373/9.86 atm/3-12h                         | >99        | 6            |
| 9.    | [Cu <sub>2</sub> (C <sub>20</sub> H <sub>12</sub> N <sub>2</sub> O <sub>2</sub> )(COO) <sub>4</sub> ] <sub>n</sub>                 | n-Bu <sub>4</sub> NBr | 273/1 atm/48h                              | 88-96      | 7            |
| 10.   | [Cu-ABF@ASMNPs]                                                                                                                    | DBU                   | 353/1 atm/12h                              | 89-92      | 8            |
| 11.   | [Cu <sub>24</sub> (BDPO) <sub>12</sub> (H <sub>2</sub> O) <sub>12</sub> ]·30DMF·14H <sub>2</sub> O or (JUC1000)                    | TBABr                 | 298/1 atm/48                               | 29-96      | 9            |
| 12.   | [Cu <sub>2</sub> (BDC) <sub>2</sub> (DABCO)]                                                                                       | -                     | 373/8 atm./12h                             | 13         | 10           |
| 14.   | FJI-H14                                                                                                                            | n-Bu <sub>4</sub> NBr | 353/0.15 atm/24h                           | 27-95      | 11           |
| 15.   | {[Cu <sub>6</sub> (L) <sub>3</sub> (H <sub>2</sub> O) <sub>6</sub> ].(14DMF)(9H <sub>2</sub> O)} <sub>n</sub>                      | n-Bu <sub>4</sub> NBr | 298/1 bar/8-24h                            | 30-95      | 12           |
| 16.   | [Cu <sub>5</sub> (TPTC) <sub>3</sub> (BPDC-NH <sub>2</sub> ) <sub>0.5</sub> (H <sub>2</sub> O) <sub>5</sub> ] (1-NH <sub>2</sub> ) | n-Bu <sub>4</sub> NBr | 298/1 atm/36h                              | 50         | 13           |
| 17.   | [Cu <sub>5</sub> (TPTC) <sub>3</sub> (BPDC-Urea) <sub>0.5</sub> (H <sub>2</sub> O) <sub>5</sub> ] (1-Urea)                         | n-Bu <sub>4</sub> NBr | 298/1 atm/36h                              | 19-98      | 13           |
| 18.   | [Cu <sub>2</sub> (OAc) <sub>4</sub> (μ <sub>4</sub> -hmt) <sub>0.5</sub> ] <sub>n</sub>                                            | n-Bu <sub>4</sub> NBr | 273/1 atm./18h                             | 87-96      | 14           |
| 19.   | [Cu{C <sub>6</sub> H <sub>4</sub> (COO-) <sub>2</sub> }] <sub>n</sub> ·2C <sub>9</sub> H <sub>14</sub> N <sub>3</sub>              | n-Bu <sub>4</sub> NBr | 273/1 atm./18h                             | 60-80      | 14           |
| 20.   | [Cd <sub>2</sub> (Ni(salen))(DMF) <sub>3</sub> ]·4DMF·7H <sub>2</sub> O                                                            | n-Bu <sub>4</sub> NBr | 353/1MPa/12h                               | 54-99      | 15           |
| 21.   | M <sub>2</sub> (EDOB) [EDOB <sub>4</sub> <sup>-</sup> = 4,4'-(ethyne-1,2-diyl)bis(2-oxidobenzoate), M = Mg, Ni, Co, Zn, Cu, Fe]    | n-Bu <sub>4</sub> NBr | 353/1 atm/12h                              | 35-86      | 16           |
| 22.   | [Cu <sub>2</sub> (HCO <sub>2</sub> ) <sub>2</sub> (H <sub>2</sub> O) <sub>2</sub> ] <sub>n</sub>                                   | n-Bu <sub>4</sub> NBr | 273/1 atm./12h                             | 66-87      | Present work |
| 23.   | [Na{Ni(CH <sub>3</sub> CO <sub>2</sub> ) <sub>2</sub> (CH <sub>3</sub> CO <sub>2</sub> H)}] <sub>n</sub>                           | n-Bu <sub>4</sub> NBr | 273/1 atm./12h                             | 86-98      | Present work |

**Table 4.** Comparative catalytic performance of the **1** and **2** with others previously reported MOFs catalysts for cycloaddition of epoxides with CO<sub>2</sub>.

**4-methyl-1, 3-dioxolan-2-one:**

<sup>1</sup>H NMR (400 MHz, CDCl<sub>3</sub>): δ 1.49 (d, J=6.8 Hz, 3H), 4.06 (t, J=4.5 Hz, 1H), 4.73 (t, J=8.4 Hz, 1H), 4.86-4.93 (m, 1H); <sup>13</sup>C NMR (400 MHz, CDCl<sub>3</sub>): 19.15, 70.53, 73.48, 154.95; GC-MS (EI) m/z (%):102 (M<sup>+</sup>, 100).

**4-ethyl-1, 3-dioxolan-2-one:**

<sup>1</sup>H NMR (400 MHz, CDCl<sub>3</sub>): δ 1.04 (t, J=1.5Hz, 3H), 1.73-1.86 (m, 2H), 4.09 (t, J=8Hz, 1H), 4.53 (t, J=4.4Hz, 1H), 4.61 (q, J=3.6Hz, 1H) ; <sup>13</sup>C NMR (400 MHz, CDCl<sub>3</sub>): 155.08, 76.40, 68.04, 26.67, 8.36; GC-MS (EI) m/z (%):116 (M<sup>+</sup>, 100).

**4-(chloromethyl)-1, 3-dioxolan-2-one:**

<sup>1</sup>H NMR (400 MHz, CDCl<sub>3</sub>): δ 3.67-3.80 (m, 2H), 4.01 (dd, J = 3.6, 3.2 Hz, 1H), 4.58 (t, J = 1.0 Hz, 1H), 4.89-4.98 (m, 1H); ; <sup>13</sup>C NMR (400 MHz, CDCl<sub>3</sub>): 43.83, 66.84, 75.48, 154.28; GC-MS (EI) m/z (%):137 (M<sup>+</sup>, 100).

**4-(bromomethyl)-1, 3-dioxolan-2-one:**

<sup>1</sup>H NMR (400 MHz, CDCl<sub>3</sub>): δ 3.45-3.52 (m, 2H), 4.27-4.35 (dd, J = 13.7, 7.3 Hz, 1H), 4.58 (t, J = 1.0 Hz, 1H), 4.86-4.88 (m, 1H); ; <sup>13</sup>C NMR (400 MHz, CDCl<sub>3</sub>): 31.32, 68.05, 73.92, 154.09; GC-MS (EI) m/z (%):181 (M<sup>+</sup>, 100).

**4-(hydroxymethyl)-1,3-dioxolan-2-one:**

<sup>1</sup>H NMR (400 MHz, CDCl<sub>3</sub>): δ 4.80-4.82 (m, 1H), 4.14-4.21 (m, 2H), 4.01-4.02 (m, 1H), 3.30-3.58 (m, 1H), 2.45-2.50 (m, 1H); <sup>13</sup>C NMR (400 MHz, CDCl<sub>3</sub>): 38.87, 39.08, 39.29, 39.50, 39.91, 40.41, 60.61, 65.88, 155.20; GC-MS (EI) m/z (%):118 (M<sup>+</sup>, 100).

## References:

1. W.-Y. Gao, Y. Chen, Y. Niu, K. Williams, L. Cash, P.J. Perez, L. Wojtas, J. Cai, Y.-S. Chen, S. Ma, *Angew. Chem., Int. Ed.* 2014, **53**, 2615.
2. B. Zou, L. Hao, L.F. Zhi, M. G. Shi, L.C. Hui, L. Chang, W. Hu, *Journal of Catalysis* 2015, **329**, 119.
3. S.S.-Y. Chui, S.M.-F. Lo, J.P.H. Charmant, A.G. Orpen, I.D. Williams, *Science* 1999, **283**, 1148.
4. W.Y. Gao, L. Wojtas, S. Ma, *Chem. Commun.* 2014, **50**, 5316.
5. P.-Z. Li, X.-J. Wang, J. Liu, J.S. Lim, R. Zou, Y. Zhao, *J. Am. Chem. Soc.* 2016, **138**, 2142.
6. J. Ai, X. Min, C.-Y. Gao, H.-R. Tian, S. Dang, Z.-M. Sun, *Dalton Trans.*, 2017, **46**, 6756.
7. P.-Z. Li, X.-J. Wang, J. Liu, H. S. Phang, Y. Li, Y. Zhao, *Chem. Mater.* 2017, **29 (21)**, 9256.
8. R.K. Sharma, R. Gaur, M. Yadav, A. Goswami, R. Zbořil, M.B. Gawande, *Sci. Rep.* 2018, **8**, 1901.
9. H. He, Q. Sun, W. Gao, J.A. Perman, F. Sun, G. Zhu, B. Aguila, K. Forrest, B. Space, S. Ma, *Angew. Chem. Int. Ed.* 2018, **57**, 4657
10. C.-Y. Gao, H.-R. Tian, J. Ai, L.-J. Li, S. Dang, Y.-Q. Land, Z.-M. Sun, *Chem. Commun.* 2016, **52**, 11147.
11. L. Liang, C. Liu, F. Jiang, Q. Chen, L. Zhang, H. Xue, H.-L. Jiang, J. Qian, D. Yuan, M. Hong, *Nature Communications* 2017, **8**, 1233.
12. V. Sharma, D. De, R. Saha, R. Das, P.K. Chattaraj, P.K. Bharadwaj, *Chem. Commun.*, 2017, **53**, 13371.

13. L.-Q. Wei, B.-H. Ye, *Inorg. Chem.* 2019, **58**, 4385.
14. Bhaskaran, M. Trivedi, A.K. Yadav, G. Singh, A. Kumar, G. Kumar, A. Husain, N.P. Rath, *Dalton Trans.*, 2019, **48**, 10078.
15. Y. Fan, J. Li, Y. Ren, H. Jiang, *European Journal of Inorganic Chemistry*, 2017, 4982.
16. Y.B.N. Tran, P.T.K. Nguyen, Q.T. Luong, K.D. Nguyen, *Inorg. Chem.* 2020, **59**, 22, 16747.
